# Supplementary material for: A Computer Tutor for Formal & Applied Logic: A Proposal to NCR Corporation
Source: Royal Society of Chemistry journal article supplement (doi:10.1039/d3nr00386h), 1988-01-01
Supplement: d3nr00386h1.pdf [file d3nr00386h1.pdf]

Supporting Information of

**Carbon nanowires made by the insertion-and-fusion method toward carbon-hydrogen nanoelectronics**

Fu Liu<sup>1</sup>, Qingqing Wang<sup>2</sup>, Yuchao Tang<sup>1</sup>, Wan Du<sup>2</sup>, Weiwei Chang<sup>1</sup>, Zewei Fu<sup>4</sup>, Xinluo Zhao<sup>1</sup>,  
and Yi Liu<sup>\*2, 3</sup>

<sup>1</sup> Department of Physics, Shanghai University, Shanghai 200444, China.

<sup>2</sup> Materials Genome Institute, Shanghai University, Shanghai 200444, China.

<sup>3</sup> Zhejiang Laboratory, Hangzhou 311100, China.

<sup>4</sup> Yunnan Tin Industry Group (Holding) Co. Ltd. R & D Center, Kunming 650200, China.

\* Corresponding author. E-mail address: [yiliu@shu.edu.cn](mailto:yiliu@shu.edu.cn) (Yi Liu)

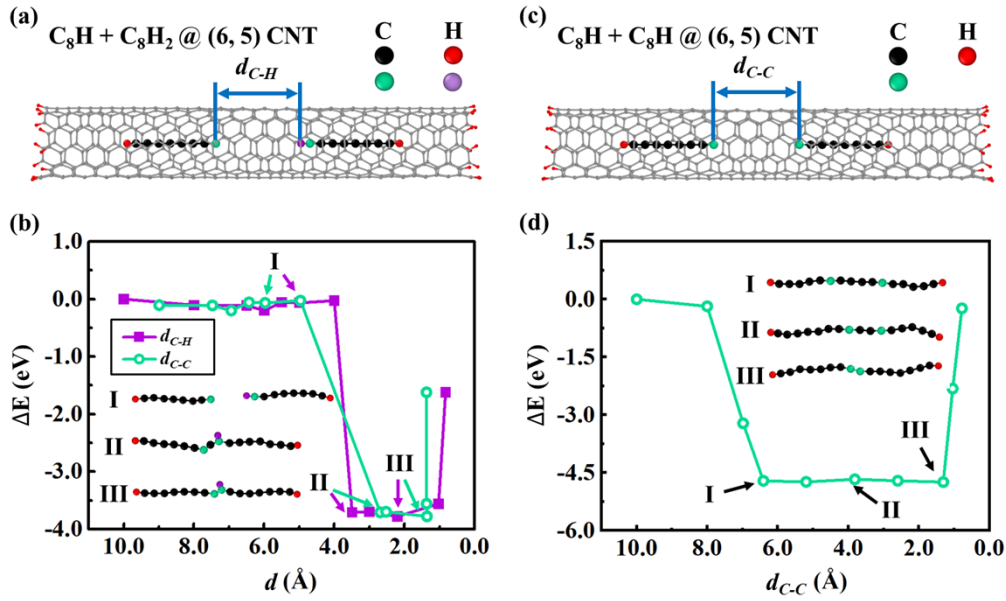

Figure S1. (a) Schematic model of the fusion process of C<sub>8</sub>H chain and C<sub>8</sub>H<sub>2</sub> chain inside (6, 5) CNT. The distance ( $d_{C-H}$ ) was constrained between the end C atom (in green) of the C<sub>8</sub>H chain and the end H atom (in purple) of the C<sub>8</sub>H<sub>2</sub> chain. (b) Relative energies as functions of  $d_{C-H}$  and  $d_{C-C}$  at 973 K. (c) Schematic model of the fusion process of two C<sub>8</sub>H chains inside (6, 5) CNT. The distance ( $d_{C-C}$ ) was constrained between the two end C atoms (in green) of the C<sub>8</sub>H chains. (d) Relative energies as functions of  $d_{C-C}$  at 973 K. The insets in (b) and (d) are typical configurations during the fusion process and the CNTs were hidden for clear visual inspection.

To examine the effects of end-capped H atoms in the fusion reactions, we performed constrained MD simulations using an unsaturated C<sub>8</sub>H chain where one of end C atoms was not saturated by H. As shown in Figure S1(a), the distance ( $d_{C-H}$ ) was constrained between the end C atom of the C<sub>8</sub>H chain and the end H atom of the C<sub>8</sub>H<sub>2</sub> chain, respectively. The energy remained unchanged when  $d_{C-H} = 10.0 - 4.0$  Å [Figure S1(b)]. The C-C fusion occurred when

the energy dropped suddenly to -3.71 eV as the constrained  $d_{C-H}$  decreased to 3.5 Å. Meanwhile, the distance ( $d_{C-C}$ ) between two end C atoms of the chains decreased from 5.0 Å to 2.7 Å, ~two times length of a common single C-C bond. In fact, an unconstrained C atom jumped over the constrained end-capped C atom and inserted between the two end C atoms as a bridge, leading to the formation of  $C_{16}H_3$  chain inside (6, 5) CNT [Figure S1(b)]. As  $d_{C-H}$  decreased further to the equilibrium distance 1.4 Å, the two end C atoms of two chains form a bond with the minimum energy of -3.78 eV. The fusion energy of the unsaturated  $C_{16}H_3$  chain was higher than -3.26 eV of saturated  $C_{16}H_4$  chain [Figure 2(b)] due to the absence of H-H repulsion at the joint position.

To examine the fusion of C chains without end-capped H atoms where only C-C contact exists, two  $C_8H$  chains were inserted and the distance ( $d_{C-C}$ ) of two unsaturated end C atoms was constrained [Figure S1(c)]. As  $d_{C-C}$  decreased to 6.4 Å, thermal vibrations caused more unconstrained C atoms in the middle of the  $C_8H$  chains jumping into the fixed gap between the two chains, forming a  $C_{16}H_2$  chain with a fusion energy of 4.7 eV [Figure S1(d)]. Further decrease of the constraint  $d_{C-C}$  could eventually bring the two end C atoms together to form a bond while the fusion energies had little changes. The C chains with unsaturated end C atoms fused more early at farther distances with much larger energy drop compared with the C chains with the H saturated ends.

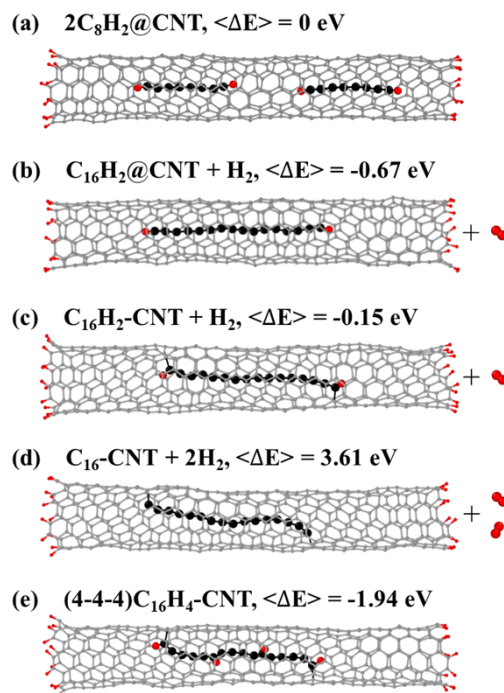

Figure S2. Configurations of carbon chains inside a finite (6, 5) CNT. (a)  $2C_8H_2@CNT$  and (b)  $C_{16}H_2@CNT + H_2$ . Configurations of carbon chains fused with the inner wall of a finite (6, 5) CNT. (c)  $C_{16}H_2-CNT + H_2$ , (d)  $C_{16}-CNT + 2H_2$ , and (e)  $(4-4-4)C_{16}H_4-CNT$ .

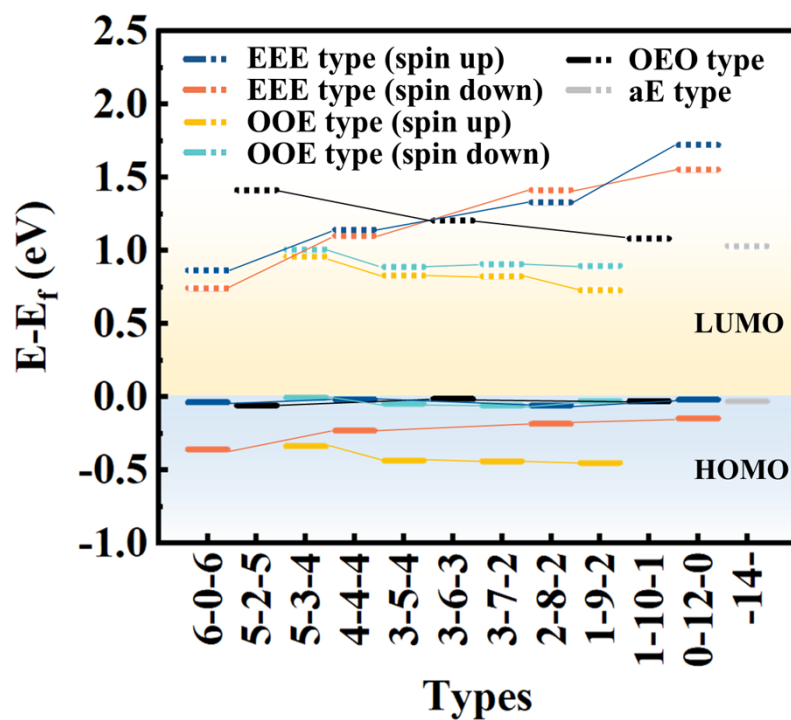

Figure S3. Energy level diagrams of the  $C_{16}H_4$  chains with the typical types of H atom configurations, including OEO, EEE, OOE, and aE types.
